# Supplementary material
Source: publisher site journal article supplement (https://www.dovepress.com/article/396706)
Supplement: Supplementary file 1 [file get_supplementary_file.php]

Supplementary S1: Participants by school type, location, and questionnaire types

Table S1a: Percentages of participants by school type and location

| Location | School | | n | % |
| --- | --- | --- | --- | --- |
| Public | Private |
| Bangkok | 12 | 43 | 55 | 7.8 |
| Chiang Rai | 50 | 45 | 95 | 13.5 |
| Udon Thani | 229 | 138 | 367 | 52.4 |
| Chonburi | 48 | 43 | 91 | 13.0 |
| Songkhla | 50 | 43 | 93 | 13.3 |
| Total | 389 | 312 | 701 | 100.0 |

Table S1b: Percentage of participants by type of questionnaires and school location

| Location | Type of questionaries | | | | Total |
| --- | --- | --- | --- | --- | --- |
| Paper-based (n) | % | Online (n) | % |
| Bangkok | 43 | 78.2 | 12 | 21.8 | 55 |
| Chiang Rai | 95 | 100.0 | 0 | 0.0 | 95 |
| Udon Thani | 0 | 0.0 | 367 | 100.0 | 367 |
| Chonburi | 0 | 0.0 | 91 | 100.0 | 91 |
| Songkhla | 93 | 100.0 | 0 | 0.0 | 93 |
| Total | 231 | 32.9 | 470 | 67.1 | 701 |

Table S1c: Characteristics of schools with face-to-face and online questionnaires

| **Type of survey** | **Region** | **Type of school** |
| --- | --- | --- |
| **Face-to-face survey** | | |
| Primary school 1 Chiang Rai | North | Public |
| Primary school 2 Chiang Rai | North | Private |
| Primary school 1 Songkhla | South | Public |
| Primary school 2 Songkhla | South | Private |
| Primary school 1 Bangkok | Central | Private |
| **Online surveys** | | |
| Primary school 1 Udon Thani | Northeast | Public |
| Primary school 2 Udon Thani | Northeast | Private |
| Primary school 1 Chonburi | East | Public |
| Primary school 2 Chonburi | East | Private |
| Primary school 2 Bangkok | Central | Public |

**Supplementary S2:** Mental health problems of Thai primary school children by questionnaire types

**Table S2** Mental health problems of Thai primary school children using parent-reported SDQ version by questionnaire types

| Type | Children with SDQ problems | Children without SDQ problems | Crude OR | p-value |
| --- | --- | --- | --- | --- |
| Paper based | 85 (37.9) | 139 (62.1) | Reference | 0.190 |
| Online | 203 (43.2) | 267 (56.8) | 1.2 (0.9-1.7) |
